# Supplementary material
Source: MDPI journal article supplement (https://www.mdpi.com/2073-4441/14/14/2170)
Supplement: s1 [file s1]

**Table S1.** Outlet coordinates, designations, and numbers on map.

| Number on the map | Designation | Latitude                 | Longitude                | Number on map | Designation  | Latitude                 | Longitude                |
|-------------------|-------------|--------------------------|--------------------------|---------------|--------------|--------------------------|--------------------------|
| 1.                | Sochi 1     | 43°42'30.8 <sup>II</sup> | 39°45'58.8 <sup>II</sup> | 17.           | Hosta 1      | 43°37'47.9 <sup>II</sup> | 39°54'50.3 <sup>II</sup> |
| 2.                | Sochi 2     | 43°42'32.8 <sup>II</sup> | 39°46'54.5 <sup>II</sup> | 18.           | Hosta 2      | 43°37'42.2 <sup>II</sup> | 39°54'51.7 <sup>II</sup> |
| 3.                | Sochi 3     | 43°42'46.6 <sup>II</sup> | 39°47'33.3 <sup>II</sup> | 19.           | Kepsha 1     | 43°36'57.6 <sup>II</sup> | 40°03'04.5 <sup>II</sup> |
| 4.                | Sochi 4     | 43°42'03.4 <sup>II</sup> | 39°45'53.4 <sup>II</sup> | 20.           | Kepsha 2     | 43°38'57.0 <sup>II</sup> | 39°59'54.4 <sup>II</sup> |
| 5.                | Sochi 5     | 43°38'02.4 <sup>II</sup> | 39°44'31.0 <sup>II</sup> | 21.           | CHvizhepse   | 43°37'51.7 <sup>II</sup> | 40°05'08.7 <sup>II</sup> |
| 6.                | Bzugu 1     | 43°37'54.7 <sup>II</sup> | 39°46'04.4 <sup>II</sup> | 22.           | Monashka     | 43°40'01.5 <sup>II</sup> | 40°10'23.5 <sup>II</sup> |
| 7.                | Bzugu 2     | 43°37'54.0 <sup>II</sup> | 39°46'07.3 <sup>II</sup> | 23.           | Sorokopyatka | 43°41'03.7 <sup>II</sup> | 40°12'25.4 <sup>II</sup> |
| 8.                | Vol'nica 1  | 43°39'52.6 <sup>II</sup> | 39°49'41.7 <sup>II</sup> | 24.           | Laura        | 43°41'59.2 <sup>II</sup> | 40°16'02.4 <sup>II</sup> |
| 9.                | Vol'nica 2  | 43°39'53.6 <sup>II</sup> | 39°49'52.5 <sup>II</sup> | 25.           | Berezovskij  | 43°40'54.8 <sup>II</sup> | 40°16'35.4 <sup>II</sup> |
| 10.               | Vol'nica 3  | 43°39'50.4 <sup>II</sup> | 39°49'49.9 <sup>II</sup> | 26.           | Pogranichnik | 43°39'41.6 <sup>II</sup> | 40°20'30.6 <sup>II</sup> |
| 11.               | Vol'nica 4  | 43°39'49.9 <sup>II</sup> | 39°49'54.4 <sup>II</sup> | 27.           | Semikolenko  | 43°39'13.2 <sup>II</sup> | 40°26'19.2 <sup>II</sup> |
| 12.               | Sovhoz      | 43°38'05.5 <sup>II</sup> | 39°49'36.6 <sup>II</sup> | 28.           | Pokryshka    | 43°38'21.9 <sup>II</sup> | 40°26'01.0 <sup>II</sup> |
| 13.               | Izmajlovka  | 43°37'43.0 <sup>II</sup> | 39°49'25.3 <sup>II</sup> | 29.           | Komarova     | 43°38'18.8 <sup>II</sup> | 40°26'20.3 <sup>II</sup> |
| 14.               | Progress 1  | 43°35'32.0 <sup>II</sup> | 39°49'48.9 <sup>II</sup> | 30.           | Aishkha 2    | 43°37'34.0 <sup>II</sup> | 40°28'12.9 <sup>II</sup> |
| 15.               | Progress 2  | 43°35'33.1 <sup>II</sup> | 39°49'59.2 <sup>II</sup> | 31.           | Aishkha 1    | 43°37'30.4 <sup>II</sup> | 40°28'16.4 <sup>II</sup> |
| 16.               | Progress 3  | 43°35'31.5 <sup>II</sup> | 39°50'00.3 <sup>II</sup> | 32.           | Mzymta 1     | 43°34'28.7 <sup>II</sup> | 40°37'44.6 <sup>II</sup> |
| 17.               | Hosta 1     | 43°37'47.9 <sup>II</sup> | 39°54'50.3 <sup>II</sup> | 33.           | Mzymta 2     | 43°34'22.5 <sup>II</sup> | 40°37'31.1 <sup>II</sup> |

**Table S2.** Chemical composition of groundwater of the Mzymta and Sochi River valleys.

| Number on the map | Name of groundwater source | Water sampling time | Water type | pH   | Mtotal | Na <sup>+</sup> | Ca <sup>2+</sup> | Mg <sup>2+</sup> | Cl <sup>-</sup> | SO4 <sup>2-</sup> | HCO <sup>3-</sup> |
|-------------------|----------------------------|---------------------|------------|------|--------|-----------------|------------------|------------------|-----------------|-------------------|-------------------|
|                   |                            |                     |            |      | mg/L   |                 |                  |                  |                 |                   |                   |
| 1                 | Sochi 1                    | morning             | I          | 7.43 | 164    | 2.86            | 43.40            | 2.40             | 4.48            | 1.00              | 129.93            |
|                   |                            | evening             |            | 7.16 | 194    | 2.79            | 42.23            | 2.34             | 4.90            | 1.00              | 147.25            |
| 2                 | Sochi 2                    | morning             | I          | 7.55 | 224    | 1.76            | 63.63            | 1.36             | 5.88            | 1.00              | 181.90            |
|                   |                            | evening             |            | 7.15 | 208    | 2.02            | 64.72            | 1.53             | 5.60            | 1.00              | 212.22            |
| 3                 | Sochi 3                    | morning             | I          | 7.55 | 248    | 3.93            | 70.53            | 5.77             | 5.46            | 40.00             | 207.89            |
|                   |                            | evening             |            | 7.45 | 248    | 4.01            | 71.02            | 5.81             | 5.32            | 40.00             | 203.56            |
| 4                 | Sochi 4                    | morning             | I          | 6.79 | 116    | 1.58            | 32.95            | 1.59             | 2.94            | 20.00             | 108.28            |
|                   |                            | evening             |            | 7.90 | 270    | 2.15            | 73.38            | 2.06             | 3.22            | 20.00             | 112.61            |
| 5                 | Sochi 5                    | morning             | I          | 7.45 | 288    | 1.53            | 97.66            | 2.12             | 4.48            | 1.00              | 303.17            |
|                   |                            | evening             |            | 7.58 | 304    | 2.02            | 99.75            | 2.83             | 4.76            | 1.00              | 333.49            |
| 6                 | Bzugu 1                    | morning             | I          | 7.87 | 328    | 4.75            | 78.09            | 3.73             | 12.18           | 50.00             | 277.18            |
|                   |                            | evening             |            | 7.79 | 337    | 4.89            | 81.21            | 3.88             | 12.67           | 51.50             | 285.50            |
| 7                 | Bzugu 2                    | morning             | I          | 7.79 | 358    | 4.86            | 76.70            | 3.83             | 6.90            | 48.94             | 236.66            |
|                   |                            | evening             |            | 7.73 | 366    | 5.11            | 80.04            | 3.91             | 7.42            | 50.00             | 242.54            |
| 8                 | Vol'nica 1                 | morning             | I          | 6.05 | 148    | 2.52            | 41.68            | 1.60             | 11.34           | 1.00              | 151.59            |
|                   |                            | evening             |            | 6.85 | 146    | 1.36            | 35.73            | 1.24             | 5.88            | 1.00              | 138.59            |
| 9                 | Vol'nica 2                 | morning             | I          | 7.07 | 184    | 0.87            | 52.45            | 0.87             | 5.60            | 1.00              | 181.90            |
|                   |                            | evening             |            | 7    | 164    | 1.55            | 54.86            | 1.54             | 10.92           | 1.00              | 125.60            |
|                   |                            | morning             |            | 7.05 | 204    | 2.28            | 65.78            | 2.26             | 10.50           | 1.00              | 212.22            |

|    |              |         |     |      |      |        |        |       |        |        |        |
|----|--------------|---------|-----|------|------|--------|--------|-------|--------|--------|--------|
| 10 | Vol'nica 3   | evening | I   | 6.95 | 172  | 1.64   | 57.27  | 1.94  | 13.86  | 1.00   | 164.58 |
| 11 | Vol'nica 4   | morning | I   | 7.18 | 282  | 6.09   | 90.56  | 4.47  | 13.44  | 40.00  | 225.21 |
|    |              | evening |     | 7.25 | 278  | 6.70   | 95.56  | 4.73  | 9.80   | 40.00  | 233.87 |
| 12 | Sovhoz       | noon    | II  | 7.15 | 278  | 5.62   | 75.62  | 3.89  | 6.86   | 65.00  | 212.22 |
| 13 | Izmajlovka   | noon    | II  | 7.43 | 362  | 5.49   | 111.31 | 5.33  | 10.50  | 80.00  | 216.16 |
| 14 | Progress 1   | noon    | III | 6.7  | 578  | 37.33  | 151.17 | 7.44  | 31.22  | 130.00 | 368.14 |
| 15 | Progress 2   | noon    | III | 6.67 | 790  | 43.50  | 186.55 | 15.26 | 11.48  | 150.00 | 415.78 |
| 16 | Progress 3   | noon    | III | 6.79 | 574  | 38.15  | 151.58 | 11.77 | 10.08  | 140.00 | 454.76 |
| 17 | Hosta 1      | morning | IV  | 7.09 | 1104 | 303.89 | 4.98   | 5.01  | 291.20 | 40.00  | 606.34 |
|    |              | evening |     | 7.18 | 1146 | 300.53 | 5.82   | 5.46  | 310.80 | 40.00  | 628.00 |
| 18 | Hosta 2      | morning | IV  | 8.1  | 1178 | 283.78 | 1.90   | 0.21  | 208.80 | 40.00  | 918.17 |
|    |              | evening |     | 7.95 | 1212 | 305.43 | 1.76   | 0.22  | 289.00 | 40.00  | 866.20 |
| 19 | Kepsha 1     | noon    | I   | 7.79 | 358  | 4.86   | 76.70  | 3.83  | 6.90   | 48.94  | 236.66 |
| 20 | Kepsha 2     | noon    | I   | 7.48 | 252  | 2.26   | 80.24  | 2.25  | 4.34   | 1.00   | 233.87 |
| 21 | Chvizhepse   | noon    | I   | 6.45 | 166  | 7.33   | 30.10  | 6.72  | 3.64   | 1.00   | 121.27 |
| 22 | Monashka     | noon    | II  | 7.07 | 114  | 3.65   | 21.55  | 5.00  | 3.08   | 73.63  | 125.00 |
| 23 | Sorokopyatka | noon    | I   | 7.05 | 68   | 2.08   | 12.29  | 1.60  | 3.08   | 1.00   | 47.64  |
| 24 | Laura        | noon    | II  | 6.28 | 106  | 3.17   | 14.02  | 4.93  | 2.38   | 60.00  | 56.30  |
| 25 | Berezovskij  | noon    | II  | 7.35 | 172  | 4.83   | 43.05  | 4.69  | 4.20   | 40.00  | 129.93 |
| 26 | Pogranichnik | noon    | II  | 6.57 | 160  | 1.63   | 13.90  | 1.31  | 5.32   | 40.00  | 51.97  |
| 27 | Semikolenko  | noon    | II  | 7.75 | 206  | 6.37   | 39.64  | 12.61 | 2.52   | 125.00 | 181.90 |
| 28 | Pokryshka    | noon    | I   | 7.68 | 76   | 1.60   | 17.31  | 2.97  | 3.08   | 1.00   | 73.63  |
| 29 | Komarova     | noon    | I   | 7.45 | 92   | 2.06   | 20.13  | 1.91  | 2.38   | 1.00   | 73.63  |
| 30 | Aishkha 2    | noon    | II  | 6.83 | 254  | 1.22   | 39.03  | 12.78 | 2.94   | 125.00 | 125.60 |
| 31 | Aishkha 1    | noon    | I   | 7.63 | 62   | 1.63   | 14.08  | 1.33  | 1.82   | 1.00   | 64.97  |
| 32 | Mzymta 1     | morning | V   | 7.45 | 314  | 0.49   | 9.87   | 0.71  | 10.08  | 20.00  | 43.31  |
|    |              | evening |     | 8.12 | 333  | 0.54   | 10.56  | 0.75  | 10.68  | 21.60  | 45.48  |
| 33 | Mzymta 2     | morning | V   | 7.63 | 309  | 0.50   | 10.43  | 0.71  | 10.36  | 20.12  | 44.95  |
|    |              | evening |     | 8.12 | 333  | 0.52   | 10.75  | 0.76  | 10.68  | 21.40  | 46.34  |

**Table S3.** Elemental composition of groundwater of the Mzymta and Sochi River valleys.

| Number<br>map             | Water<br>sampling time | Water<br>type | B    | Na   | Mg   | Al   | Si   | S     | K    | Ca     | V    | Mn   | Fe   | Cu   | Zn   |
|---------------------------|------------------------|---------------|------|------|------|------|------|-------|------|--------|------|------|------|------|------|
|                           |                        |               | µg/L |      |      |      |      |       |      |        |      |      |      |      |      |
| Limits of detection (LOD) |                        |               | 1    | 10   | 5    | 1    | 12   | 18    | 10   | 10     | 0.1  | 0.1  | 5    | 0.5  | 1    |
| 1                         | morning                | I             | 17.1 | 2859 | 2400 | 5.9  | 4871 | 4042  | 350  | 43396  | 0.41 | 0.88 | LOD  | LOD  | LOD  |
|                           | evening                |               | 16   | 2787 | 2336 | 8.5  | 4814 | 4268  | 354  | 42227  | 0.43 | 1.3  | LOD  | LOD  | LOD  |
| 2                         | morning                | I             | 10.6 | 1765 | 1357 | 1.9  | 4132 | 1796  | 661  | 63629  | 0.48 | 0.11 | LOD  | LOD  | LOD  |
|                           | evening                |               | 10.7 | 2016 | 1527 | 2    | 4561 | 2004  | 718  | 64717  | 0.39 | LOD  | LOD  | LOD  | LOD  |
| 3                         | morning                | I             | 29.5 | 3932 | 5771 | 14.6 | 4874 | 10917 | 468  | 70533  | 0.46 | 0.28 | 7.7  | LOD  | LOD  |
|                           | evening                |               | 28.5 | 4005 | 5810 | 6.3  | 4941 | 11645 | 486  | 71021  | 0.31 | 0.21 | LOD  | LOD  | LOD  |
| 4                         | morning                | I             | 9.5  | 1576 | 1595 | 84.1 | 4141 | 2171  | 349  | 32955  | 0.44 | 0.9  | 39.9 | LOD  | LOD  |
|                           | evening                |               | 15.4 | 2155 | 2060 | 15.8 | 4242 | 3678  | 361  | 73379  | 0.44 | 2.2  | 24.5 | LOD  | LOD  |
| 5                         | morning                | I             | 13.9 | 1533 | 2119 | 10.2 | 3166 | 2752  | 677  | 97659  | 0.45 | 1.2  | 13   | LOD  | 1.9  |
|                           | evening                |               | 16   | 2018 | 2827 | 6.8  | 3653 | 3712  | 746  | 99753  | 0.52 | 0.9  | 11   | LOD  | 1.5  |
| 6                         | morning                | I             | 30.3 | 4750 | 3733 | 42.4 | 4153 | 11711 | 1549 | 78087  | 0.74 | 6.9  | 36   | 0.97 | 1.6  |
|                           | evening                |               | 30.4 | 5114 | 3907 | 38.6 | 4300 | 11858 | 1622 | 80039  | 0.68 | 6.1  | 33.9 | 0.94 | LOD  |
| 7                         | morning                | I             | 42.2 | 7259 | 3952 | 51.9 | 4094 | 20467 | 1146 | 115888 | 0.75 | 11.3 | 27.9 | 1.4  | 1.9  |
|                           | evening                |               | 41.8 | 7050 | 3904 | 41.6 | 4067 | 20857 | 1195 | 115380 | 0.71 | 8    | 27.7 | 1.4  | 2.1  |
| 8                         | morning                | I             | 11.8 | 2524 | 1601 | 12.2 | 4104 | 3226  | 369  | 41678  | 0.28 | 5.5  | LOD  | 3.8  | 47   |
|                           | evening                |               | 11.1 | 1357 | 1237 | 56.3 | 3805 | 2099  | 325  | 35730  | 0.43 | 5.6  | 26.8 | 2.3  | 14.9 |
| 9                         | morning                | I             | 9.1  | 868  | 875  | 10.3 | 3185 | 1253  | 560  | 52445  | 0.37 | 10.6 | 6.9  | 0.71 | 6.5  |
|                           | evening                |               | 11.4 | 1552 | 1544 | 181  | 3495 | 1133  | 997  | 54865  | 0.72 | 4.5  | 179  | 1.2  | 9.7  |
| 10                        | morning                | I             | 19.8 | 2282 | 2259 | 23.6 | 3769 | 2516  | 792  | 65784  | LOD  | 8.9  | 41.4 | 3.8  | 41.9 |
|                           | evening                |               | 16   | 1638 | 1935 | 353  | 4265 | 1462  | 929  | 57275  | 0.94 | 13.5 | 328  | 1.7  | 741  |
| 11                        | morning                | I             | 30.7 | 6088 | 4468 | 14.8 | 4297 | 9855  | 1277 | 90562  | 0.33 | 10.3 | 41   | 1.2  | 14.8 |
|                           | evening                |               | 28.7 | 6698 | 4730 | 321  | 4442 | 9384  | 1400 | 95564  | 0.34 | 3.4  | 47.5 | 1.5  | 13.5 |

| 12                        | morning             | II         | 29.5 | 5624   | 3887  | 2.1  | 4353 | 12026 | 1190  | 75616  | 0.38 | 0.42 | LOD  | 0.55 | 2.6  |
|---------------------------|---------------------|------------|------|--------|-------|------|------|-------|-------|--------|------|------|------|------|------|
|                           | evening             |            | 32.3 | 6657   | 4077  | 23.9 | 4406 | 12244 | 1273  | 76653  | LOD  | 1.4  | 6.2  | 4.5  | 8.7  |
| 13                        | morning             | II         | 28.6 | 5486   | 5329  | 6.2  | 5860 | 15729 | 1617  | 111313 | 0.37 | 0.59 | LOD  | 0.68 | 1.7  |
|                           | evening             |            | 27.7 | 5068   | 5273  | 5.7  | 5792 | 15572 | 1397  | 110805 | 0.39 | 0.54 | LOD  | 2.4  | 9.9  |
| 14                        | noon                | III        | 48.9 | 17167  | 7471  | LOD  | 4991 | 20380 | 2593  | 151067 | 0.37 | 8.2  | LOD  | 5.1  | 10.1 |
| 15                        | noon                | III        | 47.5 | 17330  | 7438  | LOD  | 4940 | 19933 | 2596  | 151169 | 0.29 | 6.2  | LOD  | 0.78 | 3.6  |
| 16                        | noon                | III        | 54.3 | 8154   | 11771 | 15.2 | 5397 | 23113 | 2648  | 151575 | 0.81 | 6.2  | 12.3 | 1.1  | 2.6  |
| 17                        | morning             | IV         | 373  | 303888 | 5009  | 35.2 | 5264 | 8249  | 1575  | 49767  | 0.7  | 8.7  | 65   | 1.5  | 18.2 |
|                           | evening             |            | 375  | 300530 | 5457  | 36.1 | 5009 | 7434  | 1800  | 58170  | LOD  | 11.7 | 112  | 1.8  | 30.8 |
| 18                        | morning             | IV         | 1033 | 283781 | 209   | 23   | 3860 | 6057  | 558   | 1905   | 0.86 | 7.5  | 48.5 | LOD  | LOD  |
|                           | evening             |            | 903  | 305432 | 219   | 12.5 | 4311 | 8293  | 641   | 1757   | LOD  | 3.1  | 61.4 | LOD  | LOD  |
| 19                        | noon                | I          | 14   | 2263   | 2252  | 2.1  | 3617 | 1502  | 301   | 80242  | 0.53 | 0.23 | LOD  | LOD  | 4.2  |
| 20                        | morning             | I          | 73.8 | 7329   | 6721  | 1.8  | 6985 | 4118  | 646   | 30098  | 0.22 | 0.38 | LOD  | LOD  | 4.5  |
|                           | evening             |            | 95.4 | 9196   | 8666  | 3.4  | 8875 | 5804  | 802   | 38953  | 0.31 | 1.2  | LOD  | 16.3 | 1.8  |
| 21                        | morning             | I          | 30.4 | 7013   | 2987  | 35.9 | 3928 | 8618  | 1660  | 73898  | 0.51 | 1.1  | 21   | 1.2  | LOD  |
|                           | evening             |            | 30.4 | 6291   | 2829  | 41.5 | 3833 | 8439  | 1664  | 72383  | 0.63 | 1.1  | 26.9 | 1.2  | LOD  |
| 22                        | noon                | II         | 28.7 | 3653   | 4996  | 23.1 | 4735 | 5219  | 400   | 21547  | 0.29 | 0.72 | 15.4 | LOD  | LOD  |
| 23                        | morning             | I          | 3.8  | 2081   | 1598  | LOD  | 5583 | 1502  | 155   | 12295  | 1    | 0.12 | LOD  | LOD  | LOD  |
|                           | evening             |            | 3.8  | 2125   | 1604  | LOD  | 5681 | 1524  | 148   | 12895  | 1    | 0.34 | LOD  | 0.64 | LOD  |
| 24                        | noon                | II         | 5.8  | 3175   | 4935  | LOD  | 5054 | 7646  | 155   | 14023  | 0.12 | 0.87 | LOD  | LOD  | 87.9 |
| 25                        | noon                | II         | 4.8  | 4829   | 4689  | 2.8  | 7405 | 7690  | 316   | 43051  | 0.23 | 0.56 | 6.9  | LOD  | 7.7  |
| 26                        | noon                | II         | 2.1  | 1634   | 1305  | 3.5  | 3592 | 1184  | 175   | 13901  | 0.28 | 0.34 | LOD  | LOD  | LOD  |
| 27                        | morning             | II         | 26.7 | 6370   | 12612 | 4.2  | 3097 | 5872  | 416   | 39645  | 1.2  | 1.2  | 11.1 | 1.4  | 4.9  |
|                           | evening             |            | 26.4 | 6060   | 12296 | 15.9 | 3123 | 6172  | 408   | 39858  | 1.1  | 0.65 | LOD  | LOD  | LOD  |
| 28                        | morning             | I          | 8.7  | 1601   | 2975  | 17.8 | 4100 | 1058  | 334   | 17307  | 0.11 | 0.45 | LOD  | LOD  | LOD  |
|                           | evening             |            | 9.1  | 1760   | 4176  | 3.6  | 3927 | 1187  | 362   | 25116  | 0.19 | 0.75 | LOD  | LOD  | LOD  |
| 29                        | morning             | I          | 6.3  | 2062   | 1906  | 4.6  | 4772 | 1940  | 216   | 20134  | 0.95 | 0.49 | LOD  | LOD  | LOD  |
|                           | evening             |            | 5.5  | 1944   | 1970  | 9.8  | 4985 | 1966  | 200   | 20327  | 1    | 0.38 | LOD  | 0.62 | 3    |
| 30                        | morning             | I          | 11   | 1218   | 12777 | LOD  | 2435 | 12357 | 561   | 39035  | 0.35 | 0.21 | LOD  | LOD  | 1.5  |
|                           | evening             |            | 14.8 | 1638   | 15019 | 4.6  | 1992 | 7370  | 1690  | 52181  | 0.3  | 0.33 | LOD  | LOD  | 1.6  |
| 31                        | morning             | II         | 2    | 1629   | 1333  | 4.5  | 3661 | 1168  | 245   | 14084  | 0.31 | 0.98 | LOD  | 4.4  | 7.3  |
|                           | evening             |            | 3.2  | 1716   | 1301  | 6.1  | 3595 | 1173  | 178   | 14105  | 0.28 | 0.67 | LOD  | 0.66 | 5.8  |
| 32                        | morning             | V          | 5.3  | 493    | 709   | 7.5  | 1770 | 1482  | 132   | 9867   | 0.4  | 12.7 | 8.3  | 1.3  | 14.3 |
|                           | evening             |            | 5.7  | 513    | 752   | 7.7  | 1858 | 1556  | 138   | 10064  | 0.4  | 12.9 | 8.7  | 1.4  | 14.9 |
| 33                        | morning             | V          | 4.9  | 474    | 667   | 7.3  | 1681 | 1408  | 125   | 9670   | 0.4  | 12.4 | 7.8  | 1.3  | 13.7 |
|                           | evening             |            | 5.2  | 483    | 688   | 7.6  | 1717 | 1497  | 128   | 10360  | 0.4  | 13.2 | 8.3  | 1.3  | 14.7 |
| Number map                | Water sampling time | Water type | As   | Se     | Br    | Sr   | Ba   | Hg    | Pb    | Li     | Be   | Rb   | Y    | Zr   | Mo   |
| µg/L                      |                     |            |      |        |       |      |      |       |       | ng/L   |      |      |      |      |      |
| Limits of detection (LOD) |                     |            | 0.1  | 0.5    | 20    | 0.1  | 0.1  | 0.01  | 0.02  | 7      | 8    | 20   | 5    | 6    | 20   |
| 1                         | morning             | I          | LOD  | 0.9    | LOD   | 317  | 2.8  | LOD   | LOD   | 3298   | LOD  | 178  | 10.9 | LOD  | 378  |
|                           | evening             |            | LOD  | 1.2    | LOD   | 320  | 3    | LOD   | LOD   | 3179   | LOD  | 177  | 15.1 | LOD  | 468  |
| 2                         | morning             | I          | LOD  | LOD    | LOD   | 288  | 14   | LOD   | LOD   | 1248   | LOD  | 303  | 6.3  | LOD  | 89.9 |
|                           | evening             |            | LOD  | LOD    | LOD   | 315  | 14   | LOD   | LOD   | 1261   | LOD  | 313  | LOD  | LOD  | 98.4 |
| 3                         | morning             | I          | LOD  | 4.1    | LOD   | 496  | 18   | LOD   | LOD   | 6635   | LOD  | 247  | 7    | LOD  | 603  |
|                           | evening             |            | LOD  | 4      | LOD   | 500  | 17   | LOD   | LOD   | 6539   | LOD  | 232  | LOD  | LOD  | 617  |
| 4                         | morning             | I          | LOD  | LOD    | LOD   | 188  | 14.4 | LOD   | 0.027 | 1129   | LOD  | 267  | 89.9 | 30.1 | 162  |
|                           | evening             |            | LOD  | LOD    | LOD   | 353  | 21.1 | LOD   | 0.038 | 2692   | LOD  | 184  | 62.7 | LOD  | 92.5 |
| 5                         | morning             | I          | LOD  | LOD    | LOD   | 480  | 57.9 | LOD   | 0.021 | 2599   | LOD  | 295  | 41.3 | LOD  | 191  |
|                           | evening             |            | LOD  | 1      | LOD   | 563  | 62   | LOD   | LOD   | 3415   | LOD  | 318  | 19.3 | LOD  | 221  |
| 6                         | morning             | I          | LOD  | 4.7    | LOD   | 317  | 40.4 | LOD   | 0.36  | 8066   | 8.8  | 635  | 119  | 26.7 | 1146 |
|                           | evening             |            | LOD  | 4.9    | LOD   | 321  | 40.9 | LOD   | 0.29  | 8058   | LOD  | 617  | 103  | 23.5 | 1111 |
| 7                         | morning             | I          | LOD  | 3.4    | LOD   | 421  | 59.5 | LOD   | 0.25  | 4503   | 11   | 558  | 185  | 29.4 | 1347 |
|                           | evening             |            | LOD  | 3.5    | LOD   | 409  | 59.8 | LOD   | 0.56  | 4604   | LOD  | 537  | 149  | 29.1 | 1420 |
| 8                         | morning             | I          | LOD  | 0.8    | LOD   | 252  | 10.8 | LOD   | 1.4   | 2529   | LOD  | 338  | 16.6 | LOD  | 258  |

| 9                         | evening             |            | LOD  | LOD  | LOD  | 220  | 10   | LOD   | 2.3   | 2087  | LOD  | 442  | 51.5 | 33.4 | 266  |
|---------------------------|---------------------|------------|------|------|------|------|------|-------|-------|-------|------|------|------|------|------|
|                           | morning             | I          | LOD  | LOD  | LOD  | 218  | 28.1 | LOD   | 0.99  | 1123  | LOD  | 225  | 13.7 | LOD  | 82.2 |
|                           | evening             |            | LOD  | LOD  | LOD  | 220  | 25.8 | LOD   | 1.7   | 1743  | 12.5 | 514  | 108  | 144  | 96.6 |
| 10                        | morning             | I          | LOD  | LOD  | LOD  | 336  | 80.4 | LOD   | 3     | 4072  | LOD  | 352  | 58.7 | 11.5 | 98.1 |
|                           | evening             |            | LOD  | LOD  | LOD  | 269  | 98.1 | LOD   | 5.6   | 3494  | 11.7 | 696  | 206  | 195  | 81.2 |
| 11                        | morning             | I          | LOD  | 1.8  | LOD  | 308  | 103  | LOD   | 1.2   | 10285 | LOD  | 922  | 23.7 | 7.8  | 328  |
|                           | evening             |            | LOD  | 1.8  | LOD  | 321  | 109  | LOD   | 1.3   | 10497 | LOD  | 898  | 26.1 | 14.4 | 302  |
| 12                        | morning             | II         | LOD  | 0.8  | LOD  | 289  | 93.9 | LOD   | LOD   | 9450  | LOD  | 1025 | 14.7 | LOD  | 356  |
|                           | evening             |            | LOD  | 1.3  | LOD  | 295  | 95.6 | LOD   | 0.93  | 9805  | LOD  | 1122 | 21.2 | 7.3  | 358  |
| 13                        | morning             | II         | LOD  | 0.7  | LOD  | 444  | 57.1 | LOD   | LOD   | 15225 | LOD  | 1130 | 15.9 | LOD  | 123  |
|                           | evening             |            | LOD  | 0.7  | LOD  | 440  | 57   | LOD   | 0.15  | 14920 | LOD  | 986  | 21.2 | LOD  | 114  |
| 14                        | noon                | III        | LOD  | LOD  | 21   | 519  | 98.6 | LOD   | 0.16  | 19470 | LOD  | 2608 | LOD  | LOD  | 113  |
| 15                        | noon                | III        | LOD  | LOD  | LOD  | 519  | 97.3 | LOD   | LOD   | 19500 | LOD  | 2579 | LOD  | LOD  | 112  |
| 16                        | noon                | III        | LOD  | 1.1  | LOD  | 670  | 50.6 | LOD   | 0.13  | 32289 | LOD  | 3295 | 30.1 | LOD  | 118  |
| 17                        | morning             | IV         | LOD  | 11.4 | 3096 | 1182 | 279  | 0.093 | 0.6   | 63192 | LOD  | 867  | LOD  | LOD  | 1507 |
|                           | evening             |            | LOD  | 9    | 3415 | 1271 | 302  | LOD   | 1.9   | 61242 | LOD  | 966  | LOD  | LOD  | 1382 |
| 18                        | morning             | IV         | LOD  | LOD  | 637  | 107  | 15.1 | LOD   | 0.87  | 56462 | LOD  | 465  | LOD  | LOD  | 3714 |
|                           | evening             |            | LOD  | LOD  | 520  | 66.4 | 9.2  | LOD   | 0.31  | 50249 | LOD  | 341  | LOD  | LOD  | 3145 |
| 19                        | noon                | I          | LOD  | LOD  | LOD  | 348  | 152  | LOD   | LOD   | 3777  | LOD  | 222  | 6.2  | LOD  | 263  |
| 20                        | morning             | I          | 2    | LOD  | LOD  | 175  | 4.4  | LOD   | LOD   | 12800 | LOD  | 1573 | 10.2 | 6.4  | 287  |
|                           | evening             |            | 2    | 0.7  | LOD  | 217  | 9.1  | LOD   | 2.4   | 14840 | LOD  | 1812 | 39.8 | LOD  | 515  |
| 21                        | morning             | I          | LOD  | 2.9  | LOD  | 265  | 39.5 | 0.013 | 0.045 | 2603  | LOD  | 463  | 99.4 | 33.6 | 1000 |
|                           | evening             |            | LOD  | 3.2  | LOD  | 261  | 39.6 | 0.01  | 0.045 | 2663  | LOD  | 478  | 99   | 55.3 | 1011 |
| 22                        | noon                | II         | 0.21 | LOD  | LOD  | 82.8 | 4    | LOD   | LOD   | 1216  | LOD  | 346  | 11.5 | 7    | 147  |
| 23                        | morning             | I          | 0.9  | LOD  | LOD  | 46   | 0.49 | LOD   | LOD   | 1078  | LOD  | 65.3 | LOD  | LOD  | 82.4 |
|                           | evening             |            | 0.81 | LOD  | LOD  | 45.8 | 0.92 | LOD   | 3.2   | 1075  | LOD  | 69.6 | 5.4  | LOD  | 206  |
| 24                        | noon                | II         | LOD  | LOD  | LOD  | 64.7 | 1.3  | LOD   | 0.067 | 2888  | LOD  | 231  | LOD  | LOD  | 34.1 |
| 25                        | noon                | II         | 0.25 | LOD  | LOD  | 255  | 2.1  | LOD   | 3.5   | 10786 | LOD  | 302  | LOD  | LOD  | 379  |
| 26                        | noon                | II         | 0.14 | LOD  | LOD  | 27.3 | 1.1  | LOD   | 2.1   | 105   | LOD  | 91.5 | 8.5  | LOD  | 166  |
| 27                        | morning             | II         | LOD  | LOD  | LOD  | 164  | 1.6  | LOD   | 0.14  | 2836  | LOD  | 371  | 8.2  | LOD  | 3848 |
|                           | evening             |            | 0.32 | LOD  | LOD  | 165  | 1.8  | LOD   | 1.2   | 2961  | LOD  | 380  | 12.3 | LOD  | 3900 |
| 28                        | morning             | I          | 0.37 | LOD  | LOD  | 52   | 17.7 | LOD   | LOD   | 1391  | LOD  | 358  | 15.9 | LOD  | 160  |
|                           | evening             |            | 0.27 | LOD  | LOD  | 71.3 | 24.7 | LOD   | 3.7   | 1630  | LOD  | 393  | 17.4 | LOD  | 327  |
| 29                        | morning             | I          | 4.2  | LOD  | LOD  | 45.1 | 0.99 | LOD   | LOD   | 744   | LOD  | 327  | LOD  | LOD  | 293  |
|                           | evening             |            | 4.3  | LOD  | LOD  | 51   | 13   | LOD   | LOD   | 556   | LOD  | 264  | LOD  | LOD  | 252  |
| 30                        | morning             | I          | LOD  | LOD  | LOD  | 172  | 7.1  | 0.018 | LOD   | 8201  | LOD  | 620  | LOD  | LOD  | 35.5 |
|                           | evening             |            | LOD  | LOD  | LOD  | 209  | 13.6 | 0.011 | 3.5   | 7285  | LOD  | 1478 | 9.9  | LOD  | 225  |
| 31                        | morning             | II         | 0.2  | LOD  | LOD  | 27.9 | 0.89 | LOD   | 1.6   | 59.5  | LOD  | 94.5 | 7.9  | LOD  | 101  |
|                           | evening             |            | 0.18 | LOD  | LOD  | 35   | 2.7  | LOD   | 4.8   | 304   | LOD  | 221  | 15.4 | LOD  | 293  |
| 32                        | morning             | V          | LOD  | LOD  | LOD  | 12.7 | 3.9  | 0.011 | 0.79  | 26.2  | LOD  | 173  | 18.7 | 117  | 1117 |
|                           | evening             |            | LOD  | LOD  | LOD  | 13   | 4.1  | 0.011 | 0.8   | 27.5  | LOD  | 179  | 19.1 | 121  | 1173 |
| 33                        | morning             | V          | LOD  | LOD  | LOD  | 12.3 | 3.7  | 0.011 | 0.8   | 24.9  | LOD  | 166  | 18.3 | 114  | 1061 |
|                           | evening             |            | LOD  | LOD  | LOD  | 12.7 | 3.8  | 0.011 | 0.8   | 25.7  | LOD  | 174  | 19.7 | 118  | 1094 |
| Number map                | Water sampling time | Water type | Ag   | Cd   | In   | Sn   | Sb   | Cs    | La    | Ce    | Pr   | Nd   | Sm   | Eu   | Gd   |
|                           |                     |            | ng/L |      |      |      |      |       |       |       |      |      |      |      |      |
| Limits of detection (LOD) |                     |            | 5    | 6    | 5    | 20   | 6    | 1     | 1     | 1     | 1    | 1    | 1    | 1    | 1    |
| 1                         | morning             | I          | LOD  | LOD  | LOD  | LOD  | 21.4 | 2.2   | 11.1  | 28    | 3.7  | 13.9 | 3.4  | LOD  | 2.4  |
|                           | evening             |            | LOD  | LOD  | LOD  | LOD  | 20.1 | 3.2   | 12.9  | 39.6  | 4.5  | 18.7 | 4.5  | LOD  | 2.9  |
| 2                         | morning             | I          | LOD  | LOD  | LOD  | LOD  | 10.1 | 1.1   | 11.4  | 4.9   | 2.9  | 9.9  | 1.3  | LOD  | LOD  |
|                           | evening             |            | LOD  | LOD  | LOD  | LOD  | 13.5 | LOD   | 11.8  | 3.3   | 1.9  | 10.2 | 1.3  | LOD  | LOD  |
| 3                         | morning             | I          | LOD  | LOD  | LOD  | LOD  | 19.2 | 3.9   | 8.3   | 16.9  | 3.2  | 13.9 | 1.8  | LOD  | LOD  |
|                           | evening             |            | LOD  | LOD  | LOD  | LOD  | 16.6 | 1.7   | 8.9   | 6.7   | 2.3  | 9.6  | 1.8  | LOD  | LOD  |
| 4                         | morning             | I          | LOD  | LOD  | LOD  | LOD  | 13.9 | 11.5  | 31    | 112   | 13.7 | 65.1 | 16.5 | 3.6  | 18.1 |
|                           | evening             |            | LOD  | LOD  | LOD  | LOD  | 13.6 | 2.9   | 32.9  | 65    | 12.5 | 53   | 12.5 | 2.7  | 12.4 |
| 5                         | morning             | I          | LOD  | LOD  | LOD  | LOD  | 17.9 | 2.3   | 29.9  | 63.3  | 9.5  | 40.5 | 11.1 | 1.1  | 9.5  |
|                           | evening             |            | LOD  | LOD  | LOD  | LOD  | 16   | 2     | 16.8  | 33.3  | 6.3  | 22.6 | 3.8  | LOD  | 6.3  |

| 6                         | morning             | I          | LOD  | 60.8 | LOD   | LOD  | 147  | 7.8  | 149  | 206  | 31.8 | 143  | 31.8 | 7.1  | 30.7 |
|---------------------------|---------------------|------------|------|------|-------|------|------|------|------|------|------|------|------|------|------|
|                           | evening             |            | LOD  | 51.1 | LOD   | LOD  | 140  | 7.5  | 125  | 169  | 27.9 | 127  | 26.1 | 5.6  | 25.6 |
| 7                         | morning             | I          | LOD  | 82.3 | LOD   | LOD  | 184  | 6    | 149  | 261  | 51.9 | 228  | 48.5 | 10.8 | 51.4 |
|                           | evening             |            | LOD  | 81.4 | LOD   | LOD  | 183  | 3.7  | 124  | 206  | 40.2 | 188  | 39.4 | 8.1  | 36.5 |
| 8                         | morning             | I          | 139  | 9    | LOD   | LOD  | 48.3 | 16.5 | 20.6 | 35.7 | 4.6  | 20.2 | 3.6  | LOD  | 5.6  |
|                           | evening             |            | 13.2 | LOD  | LOD   | 145  | 41   | 72.4 | 55.2 | 88.7 | 14.5 | 59.3 | 11.8 | 3.1  | 12.9 |
| 9                         | morning             | I          | 28.3 | LOD  | LOD   | 134  | 23.3 | 2    | 18.1 | 29   | 4.3  | 13.1 | 2.7  | LOD  | 3.4  |
|                           | evening             |            | 7.9  | LOD  | LOD   | 126  | 66.2 | 19.3 | 99.2 | 175  | 27.5 | 105  | 18.4 | 4.6  | 22.5 |
| 10                        | morning             | I          | 66.3 | 11.6 | LOD   | 381  | 92.7 | 2.5  | 60.8 | 59.1 | 13.8 | 60.5 | 11.5 | 2.2  | 11.5 |
|                           | evening             |            | 8.6  | 42.8 | LOD   | 35.2 | 29.2 | 30.3 | 181  | 432  | 52.9 | 236  | 51.9 | 12.5 | 51.2 |
| 11                        | morning             | I          | 7.4  | 17.6 | LOD   | LOD  | 96   | 5.9  | 20.6 | 27   | 3.7  | 18.8 | 4.1  | LOD  | 3.3  |
|                           | evening             |            | LOD  | 6.7  | LOD   | 110  | 89.4 | 5.1  | 38.9 | 67.2 | 7.4  | 30.5 | 5    | LOD  | 6.4  |
| 12                        | morning             | II         | LOD  | LOD  | LOD   | LOD  | 52.6 | 4.7  | 5.8  | 3.5  | 2    | 11.5 | 2.3  | LOD  | 2.4  |
|                           | evening             |            | LOD  | 11.8 | LOD   | 29.5 | 64.9 | 5.6  | 12.3 | 8.4  | 3.4  | 14.3 | 2.1  | LOD  | 3.5  |
| 13                        | morning             | II         | LOD  | LOD  | LOD   | LOD  | 30.6 | 3.7  | 13.4 | 20.6 | 5.2  | 24.1 | 5.2  | LOD  | 5.1  |
|                           | evening             |            | 25.5 | 79.3 | LOD   | LOD  | 19.2 | 4.1  | 12.4 | 20   | LOD  | LOD  | 6.7  | 4    | 148  |
| 14                        | noon                | III        | LOD  | LOD  | LOD   | LOD  | 28.4 | 14.9 | LOD  |
| 15                        | noon                | III        | LOD  | LOD  | LOD   | LOD  | 28.4 | 13.2 | LOD  |
| 16                        | noon                | III        | LOD  | LOD  | LOD   | LOD  | 22   | 14.3 | 34.9 | 80.8 | 11.9 | 49.4 | 9.4  | 1.6  | 10.1 |
| 17                        | morning             | IV         | 81.9 | LOD  | 40418 | LOD  | 424  | 24.2 | 19.8 | 57.5 | 7.1  | 23.9 | 11   | LOD  | 9.8  |
|                           | evening             |            | 91.3 | LOD  | 41548 | LOD  | 360  | 22.5 | 27.7 | 72.6 | 10.1 | 50.2 | 12   | LOD  | 14   |
| 18                        | morning             | IV         | 72.3 | LOD  | 48443 | LOD  | 58.5 | 12.5 | 19.2 | 56   | 6.1  | 29.4 | 3.2  | LOD  | 7.5  |
|                           | evening             |            | LOD  | LOD  | 36858 | LOD  | LOD  | 11.4 | 10.1 | 21.1 | 2.2  | 14   | 2.5  | LOD  | LOD  |
| 19                        | noon                | I          | 142  | LOD  | LOD   | LOD  | 27.1 | 2.7  | 3.3  | 3    | 1.1  | 6    | 1.5  | LOD  | LOD  |
| 20                        | morning             | I          | 9.1  | LOD  | LOD   | LOD  | 381  | 1757 | 7.1  | 4.1  | 1.2  | 6    | LOD  | LOD  | 1.1  |
|                           | evening             |            | LOD  | LOD  | LOD   | LOD  | 712  | 1036 | 40.9 | 106  | 6    | 26.9 | 3    | LOD  | 3.5  |
| 21                        | morning             | I          | LOD  | 26.6 | LOD   | LOD  | 138  | 4.3  | 81.5 | 77.4 | 26.3 | 122  | 23.2 | 4.4  | 22.8 |
|                           | evening             |            | LOD  | 25.5 | LOD   | LOD  | 138  | 5.4  | 83.8 | 85.5 | 28   | 114  | 25.6 | 5.1  | 23.1 |
| 22                        | noon                | II         | 180  | LOD  | LOD   | LOD  | 128  | 10.6 | 8.1  | 17.9 | 3.4  | 15   | 2.9  | LOD  | 3.9  |
| 23                        | morning             | I          | 9.2  | LOD  | LOD   | LOD  | 41.5 | 5.9  | LOD  |
|                           | evening             |            | 61.6 | LOD  | LOD   | LOD  | 282  | 7    | 4.8  | 7    | 1.1  | 3.1  | LOD  | LOD  | LOD  |
| 24                        | noon                | II         | 67   | LOD  | LOD   | LOD  | 50.8 | 39.5 | 1.1  | LOD  | LOD  | LOD  | LOD  | LOD  | LOD  |
| 25                        | noon                | II         | 7.2  | LOD  | LOD   | LOD  | 206  | 97.3 | 5.7  | 6.1  | LOD  | 4.4  | 1.4  | LOD  | LOD  |
| 26                        | noon                | II         | LOD  | LOD  | LOD   | 44.2 | 148  | 41.1 | 3.1  | 4.6  | LOD  | 3.3  | LOD  | LOD  | LOD  |
| 27                        | morning             | II         | 63.9 | LOD  | LOD   | LOD  | 35.1 | 59.5 | 43.3 | 75.7 | 6.6  | 22.7 | 4.3  | LOD  | 2.8  |
|                           | evening             |            | LOD  | LOD  | LOD   | 315  | 99.5 | 57.8 | 30.9 | 47.6 | 6    | 17.9 | 4.2  | 1.1  | 3.4  |
| 28                        | morning             | I          | LOD  | LOD  | LOD   | 55   | 11.6 | 9.7  | 28.6 | 38.3 | 5    | 21   | 3.5  | LOD  | 3.3  |
|                           | evening             |            | 84.9 | LOD  | LOD   | LOD  | 323  | 3.2  | 18.8 | 22.8 | 3.4  | 13.8 | 2.5  | LOD  | 3    |
| 29                        | morning             | I          | LOD  | LOD  | LOD   | 104  | 76.1 | 97.8 | 1.5  | 2.3  | LOD  | 1.7  | LOD  | LOD  | LOD  |
|                           | evening             |            | LOD  | LOD  | LOD   | 73.9 | 73.9 | 27.6 | 1.5  | 6.7  | LOD  | 1.9  | LOD  | LOD  | LOD  |
| 30                        | morning             | I          | LOD  | LOD  | LOD   | LOD  | 43.3 | 50.4 | LOD  |
|                           | evening             |            | LOD  | LOD  | LOD   | 657  | 303  | 166  | 4.5  | 7.8  | LOD  | 2.4  | LOD  | LOD  | 1.3  |
| 31                        | morning             | II         | 68.6 | 20.3 | LOD   | LOD  | 19.3 | 1.7  | 3.9  | 7.3  | 1.1  | 3.4  | LOD  | LOD  | 2    |
|                           | evening             |            | 87.7 | 11.8 | LOD   | 244  | 401  | 96.1 | 35.1 | 46.3 | 1.6  | 9.2  | 2.1  | LOD  | 2.4  |
| 32                        | morning             | V          | 29.8 | 12.1 | LOD   | LOD  | 38.4 | 1.4  | 17.7 | 16.1 | 4    | 12.5 | 3    | LOD  | 4    |
|                           | evening             |            | 31.3 | 12.7 | LOD   | LOD  | 39.9 | 1.5  | 18.4 | 16.8 | 4.1  | 12.9 | 3    | LOD  | 4.1  |
| 33                        | morning             | V          | 28.3 | 11.5 | LOD   | LOD  | 36.9 | 1.3  | 17   | 15.5 | 3.9  | 12.1 | 2.9  | LOD  | 3.9  |
|                           | evening             |            | 30.4 | 11.8 | LOD   | LOD  | 38.8 | 1.4  | 17.4 | 16.4 | 4.1  | 12.6 | 3    | LOD  | 4    |
| Number map                | Water sampling time | Water type | Tb   | Dy   | Ho    | Er   | Tm   | Yb   | Lu   | Re   | Tl   | Bi   | Th   | U    |      |
|                           |                     |            | ng/L |      |       |      |      |      |      |      |      |      |      |      |      |
| Limits of detection (LOD) |                     |            | 1    | 1    | 1     | 1    | 1    | 1    | 1    | 1    | 2    | 1    | 2    | 1    |      |
| 1                         | morning             | I          | LOD  | 2.3  | LOD   | LOD  | LOD  | LOD  | LOD  | 2.8  | LOD  | LOD  | LOD  | 68.8 |      |
|                           | evening             |            | LOD  | 2.9  | LOD   | 1.3  | LOD  | 1.3  | LOD  | 3    | LOD  | LOD  | LOD  | 74.5 |      |
| 2                         | morning             | I          | LOD  | LOD  | LOD   | LOD  | LOD  | LOD  | LOD  | 1.7  | LOD  | LOD  | LOD  | 125  |      |
|                           | evening             |            | LOD  | LOD  | LOD   | LOD  | LOD  | LOD  | LOD  | 1.4  | LOD  | LOD  | LOD  | 134  |      |
| 3                         | morning             | I          | LOD  | LOD  | LOD   | LOD  | LOD  | LOD  | LOD  | 5.9  | LOD  | LOD  | LOD  | 155  |      |

|    |         |     |      |      |     |      |     |      |     |      |      |     |     |      |
|----|---------|-----|------|------|-----|------|-----|------|-----|------|------|-----|-----|------|
|    | evening |     | LOD  | LOD  | LOD | LOD  | LOD | LOD  | LOD | 6.2  | LOD  | LOD | LOD | 156  |
| 4  | morning | I   | 3    | 14.7 | 3.5 | 7.9  | LOD | 6.3  | LOD | 3.1  | LOD  | LOD | 9.1 | 30.9 |
|    | evening |     | 1.7  | 9.9  | 2.2 | 5.2  | LOD | 3.7  | LOD | 1.5  | LOD  | LOD | LOD | 124  |
| 5  | morning | I   | 1.7  | 9.1  | 1.8 | 3.9  | LOD | 3.6  | LOD | 1.9  | LOD  | LOD | LOD | 150  |
|    | evening |     | LOD  | 4.8  | LOD | 1.8  | LOD | 1.7  | LOD | 2.5  | LOD  | LOD | LOD | 158  |
| 6  | morning | I   | 4.8  | 22.6 | 4.3 | 10.2 | 1.4 | 7.2  | 1.4 | 42.1 | 14.5 | LOD | 6.3 | 522  |
|    | evening |     | 4.3  | 20.1 | 3.7 | 8.9  | 1.1 | 6.3  | 1.1 | 44.6 | 13.7 | LOD | 4.4 | 510  |
| 7  | morning | I   | 7.6  | 36.3 | 6.8 | 15.9 | 2   | 12   | 1.8 | 36.3 | 6.9  | LOD | 6.2 | 1408 |
|    | evening |     | 5.4  | 27   | 5.4 | 11.1 | 1.5 | 8.4  | 1.6 | 36.3 | 6.3  | LOD | 6.6 | 1415 |
| 8  | morning | I   | LOD  | 3.8  | LOD | 1.2  | LOD | 1.1  | LOD | 2.1  | LOD  | LOD | LOD | 86.8 |
|    | evening |     | 2    | 9.8  | 2   | 4.5  | LOD | 4    | LOD | 1.2  | LOD  | 1.2 | 4.7 | 70.1 |
| 9  | morning | I   | LOD  | 2.7  | LOD | 1.2  | LOD | LOD  | LOD | LOD  | LOD  | LOD | LOD | 108  |
|    | evening |     | 3.4  | 17.9 | 4   | 8.7  | 1.4 | 6.6  | 1.1 | LOD  | 3.4  | 2.3 | 20  | 69.3 |
| 10 | morning | I   | 1.9  | 8.6  | 1.8 | 4.4  | LOD | 2.6  | LOD | 1.4  | LOD  | 1.7 | 3.7 | 151  |
|    | evening |     | 6.5  | 38.5 | 6.8 | 18.3 | 2.8 | 12.8 | 2.1 | 1.2  | 4.2  | 2.3 | 29  | 65.3 |
| 11 | morning | I   | LOD  | 3.1  | LOD | 2.2  | LOD | 1.2  | LOD | 8.6  | LOD  | LOD | LOD | 144  |
|    | evening |     | LOD  | 5.1  | LOD | 2.7  | LOD | 1.9  | LOD | 8.5  | LOD  | LOD | LOD | 141  |
| 12 | morning | II  | LOD  | 2    | LOD | 1.3  | LOD | LOD  | LOD | 9    | 2.8  | LOD | LOD | 149  |
|    | evening |     | LOD  | 2.3  | LOD | 1.2  | LOD | 1.5  | LOD | 8.7  | 4.2  | 1.2 | 8.6 | 140  |
| 13 | morning | II  | LOD  | 3.1  | LOD | 1.7  | LOD | 1.1  | LOD | 5.2  | LOD  | LOD | LOD | 235  |
|    | evening |     | 17.4 | 6.9  | LOD | 2.8  | LOD | 1.9  | 1.6 | 5    | LOD  | LOD | LOD | 238  |
| 14 | noon    | III | LOD  | LOD  | LOD | LOD  | LOD | LOD  | LOD | 8.7  | 3.7  | LOD | LOD | 347  |
| 15 | noon    | III | LOD  | LOD  | LOD | LOD  | LOD | 1.2  | LOD | 9    | 3.9  | LOD | LOD | 343  |
| 16 | noon    | III | 1.8  | 7.8  | 1.5 | 3.3  | LOD | 1.8  | LOD | 12.3 | 4.2  | LOD | 4   | 506  |
| 17 | morning | IV  | 0.78 | 7.6  | 1.3 | 4.2  | LOD | LOD  | LOD | 26.8 | LOD  | LOD | LOD | 576  |
|    | evening |     | 1.5  | 7.6  | 1.2 | 2.8  | LOD | 3    | 0.8 | 22.3 | LOD  | LOD | LOD | 609  |
| 18 | morning | IV  | 0.97 | 3.6  | 1.4 | 2.4  | LOD | 1.5  | LOD | 16   | LOD  | LOD | LOD | 108  |
|    | evening |     | LOD  | LOD  | LOD | LOD  | LOD | LOD  | LOD | 16.8 | LOD  | LOD | LOD | 85.4 |
| 19 | noon    | I   | LOD  | LOD  | LOD | LOD  | LOD | LOD  | LOD | 1.2  | LOD  | LOD | LOD | 85.1 |
| 20 | morning | I   | LOD  | LOD  | LOD | LOD  | LOD | LOD  | LOD | LOD  | LOD  | LOD | LOD | 343  |
|    | evening |     | LOD  | 3.7  | 1.1 | 3.1  | LOD | 2.5  | LOD | LOD  | LOD  | LOD | LOD | 640  |
| 21 | morning | I   | 3.9  | 17.6 | 3.3 | 8.8  | LOD | 6.1  | LOD | 28.7 | 4.4  | LOD | 9   | 423  |
|    | evening |     | 3.5  | 17.8 | 3   | 6.9  | LOD | 5.4  | 1.1 | 28   | 4.5  | LOD | 8.3 | 425  |
| 22 | noon    | II  | LOD  | 2.4  | LOD | 1.1  | LOD | 1.1  | LOD | LOD  | LOD  | LOD | LOD | 5.9  |
| 23 | morning | I   | LOD  | LOD  | LOD | LOD  | LOD | LOD  | LOD | LOD  | LOD  | LOD | LOD | 2.8  |
|    | evening |     | LOD  | LOD  | LOD | LOD  | LOD | LOD  | LOD | LOD  | LOD  | LOD | LOD | 3    |
| 24 | noon    | II  | LOD  | LOD  | LOD | LOD  | LOD | LOD  | LOD | LOD  | LOD  | LOD | LOD | LOD  |
| 25 | noon    | II  | LOD  | LOD  | LOD | LOD  | LOD | LOD  | LOD | LOD  | LOD  | LOD | LOD | 52.8 |
| 26 | noon    | II  | LOD  | LOD  | LOD | LOD  | LOD | LOD  | LOD | LOD  | LOD  | LOD | LOD | 1.6  |
| 27 | morning | II  | LOD  | LOD  | LOD | 1.1  | LOD | LOD  | LOD | 2    | LOD  | LOD | 3.9 | 38.9 |
|    | evening |     | LOD  | 2.4  | LOD | 1.1  | LOD | 1.1  | LOD | 1.8  | LOD  | LOD | LOD | 39.9 |
| 28 | morning | I   | LOD  | 3.2  | LOD | 1.1  | LOD | LOD  | LOD | LOD  | LOD  | LOD | LOD | 14.2 |
|    | evening |     | LOD  | 2.6  | LOD | 1.2  | LOD | LOD  | LOD | LOD  | LOD  | LOD | 3   | 29.9 |
| 29 | morning | I   | LOD  | LOD  | LOD | LOD  | LOD | LOD  | LOD | LOD  | LOD  | LOD | LOD | 15.3 |
|    | evening |     | LOD  | LOD  | LOD | LOD  | LOD | LOD  | LOD | LOD  | LOD  | 1.8 | LOD | 19   |
| 30 | morning | I   | LOD  | LOD  | LOD | LOD  | LOD | LOD  | LOD | LOD  | LOD  | LOD | LOD | 9.2  |
|    | evening |     | LOD  | 1.4  | LOD | LOD  | LOD | LOD  | LOD | LOD  | LOD  | LOD | LOD | 20.6 |
| 31 | morning | II  | LOD  | LOD  | LOD | LOD  | LOD | LOD  | LOD | LOD  | LOD  | LOD | LOD | 1.6  |
|    | evening |     | LOD  | 1.9  | LOD | 1.2  | LOD | LOD  | LOD | LOD  | LOD  | 1.9 | LOD | 3.5  |
| 32 | morning |     | LOD  | 3.2  | LOD | 1.1  | LOD | 1.1  | LOD | LOD  | LOD  | 2   | LOD | 83.9 |
|    | evening |     | LOD  | 3.4  | LOD | 1.2  | LOD | 1.2  | LOD | LOD  | LOD  | 2.1 | LOD | 87.3 |
| 33 | morning |     | LOD  | 3    | LOD | 1.1  | LOD | 1    | LOD | LOD  | LOD  | 2   | LOD | 80.6 |
|    | evening |     | LOD  | 3.2  | LOD | 1.1  | LOD | 1    | LOD | LOD  | LOD  | 2.1 | LOD | 82.2 |

**Table S4.** Average chemical element concentrations in groundwater and groundwater clarks by [40], µg/L (P, Sc, Ti, Co, Nb, Ru, Rh, Pd, Te, Tm, Lu, Hf, Ta, W, Os, Ir, Pt, and Au are below analytical detection limits).

| Ele-<br>ment | Cla-<br>rke | Water types    |                 |                 |                |                 |
|--------------|-------------|----------------|-----------------|-----------------|----------------|-----------------|
|              |             | I              | II              | III             | IV             | V               |
| B            | 42          | 21.64 ± 1.1    | 18.15 ± 1.3     | 50.22 ± 4.5     | 671.0 ± 47.0   | 5.27 ± 0.03     |
| Al           | 280         | 40.9 ± 3.3     | 8.90 ± 0.4      | 5.57 ± 0.4      | 26.7 ± 1.9     | 7.52 ± 0.4      |
| Si           | 8100        | 4345 ± 391     | 4556 ± 364      | 5110 ± 408.8    | 4611 ± 276.7   | 1757 ± 123      |
| S            | 25000       | 5720 ± 343     | 7641 ± 687.7    | 21142 ± 1480    | 7508 ± 225.2   | 1486 ± 74.3     |
| K            | 4590        | 745 ± 44.7     | 647.5 ± 38.9    | 2612 ± 156.7    | 1143 ± 45.7    | 130.5 ± 3.9     |
| V            | 1.6         | 0.51 ± 0.05    | 0.42 ± 0.02     | 0.49 ± 0.02     | 0.60 ± 0.02    | 0.40 ± 0.03     |
| Mn           | 49          | 3.14 ± 0.3     | 0.75 ± 0.06     | 6.87 ± 0.55     | 7.75 ± 0.23    | 12.8 ± 0.38     |
| Fe           | 547         | 29.3 ± 1.8     | 6.63 ± 0.4      | 7.42 ± 0.45     | 71.84 ± 3.59   | 8.26 ± 0.33     |
| Cu           | 5.6         | 1.43 ± 0.1     | 1.43 ± 0.1      | 2.34 ± 0.21     | 1.57 ± 0.08    | 1.33 ± 0.07     |
| Zn           | 34          | 26.6 ± 2.4     | 11.6 ± 0.7      | 5.41 ± 0.27     | 14.86 ± 0.45   | 14.4 ± 1.01     |
| As           | 2.1         | 0.50 ± 0.03    | 0.16 ± 0.01     | < 0.1           | 0.30 ± 0.02    | 0.10 ± 0.01     |
| Se           | 0.2         | 1.40 ± 0.1     | 0.63 ± 0.05     | 0.70 ± 0.06     | 6.05 ± 0.36    | 0.50 ± 0.03     |
| Br           | 183         | < 20           | < 20            | 20.34 ± 1.83    | 1917 ± 115     | 20.0 ± 0.60     |
| Sr           | 185         | 268 ± 24.1     | 190.7 ± 11.4    | 569.3 ± 45.5    | 656.6 ± 32.8   | 12.7 ± 0.89     |
| Ba           | 20          | 34.7 ± 2.4     | 26.6 ± 1.9      | 82.18 ± 5.75    | 151.31 ± 7.6   | 3.90 ± 0.20     |
| Hg           | 0.07        | 0.01 ± 0.001   | < 0.01          | < 0.01          | 0.05 ± 0.003   | 0.01 ± 0.003    |
| Pb           | 2.2         | 0.92 ± 0.06    | 1.21 ± 0.06     | 0.11 ± 1.21     | 0.92 ± 0.06    | 0.80 ± 0.06     |
| Li           | 14          | 4.33 ± 0.39    | 5.88 ± 0.5      | 23.75 ± 2.14    | 57.79 ± 1.73   | 0.03 ± 0.003    |
| Be           |             | 0.01 ± 0.003   | < 0.008         | < 0.008         | < 0.008        | < 0.008         |
| Rb           | 2.2         | 0.50 ± 0.03    | 0.525 ± 0.03    | 2.83 ± 0.14     | 0.66 ± 0.05    | 0.17 ± 0.01     |
| Y            | 0.7         | 0.05 ± 0.002   | 0.014 ± 0.003   | 0.013 ± 0.003   | < 0.005        | 0.019 ± 0.004   |
| Zr           | 2.6         | 0.02 ± 0.003   | < 0.006         | < 0.006         | < 0.006        | 0.117 ± 0.003   |
| Mo           | 2.1         | 0.40 ± 0.02    | 0.818 ± 0.06    | 0.114 ± 0.01    | 2.437 ± 0.1    | 1.111 ± 0.07    |
| Ag           | 0.29        | 0.020 ± 0.001  | 0.044 ± 0.001   | < 0.005         | 0.063 ± 0.002  | 0.030 ± 0.0018  |
| Cd           | 0.02        | 0.020 ± 0.001  | 0.014 ± 0.0004  | < 0.006         | < 0.006        | 0.012 ± 0.0005  |
| In           | –           | < 0.010        | 0.005 ± 0.0002  | < 0.005         | 41.8 ± 2.01    | 0.005 ± 0.0004  |
| Sn           | 0.04        | 0.070 ± 0.001  | 0.066 ± 0.002   | < 0.020         | < 0.020        | 0.020 ± 0.0010  |
| Sb           | 1.5         | 0.110 ± 0.09   | 0.104 ± 0.006   | 0.026 ± 0.002   | 0.212 ± 0.011  | 0.039 ± 0.0012  |
| Cs           | 0.03        | 0.100 ± 0.001  | 0.035 ± 0.002   | 0.014 ± 0.0007  | 0.018 ± 0.0005 | 0.001 ± 0.0001  |
| La           | 0.04        | 0.040 ± 0.002  | 0.015 ± 0.001   | 0.012 ± 0.0007  | 0.019 ± 0.0008 | 0.018 ± 0.0005  |
| Ce           | 0.06        | 0.070 ± 0.002  | 0.022 ± 0.007   | 0.028 ± 0.001   | 0.052 ± 0.0036 | 0.016 ± 0.0008  |
| Pr           | 0.007       | 0.010 ± 0.0004 | 0.038 ± 0.001   | 0.005 ± 0.0002  | 0.006 ± 0.0002 | 0.004 ± 0.0002  |
| Nd           | 0.04        | 0.050 ± 0.001  | 0.011 ± 0.0004  | 0.017 ± 0.0007  | 0.029 ± 0.0012 | 0.013 ± 0.0005  |
| Sm           | 0.008       | 0.010 ± 0.0004 | 0.003 ± 0.0002  | 0.004 ± 0.0003  | 0.007 ± 0.0004 | 0.003 ± 0.00020 |
| Eu           | 0.001       | 0.003 ± 0.0001 | 0.001 ± 0.0001  | 0.001 ± 0.00003 | < 0.001        | 0.001 ± 0.00003 |
| Gd           | 0.008       | 0.011 ± 0.0002 | 0.015 ± 0.001   | 0.004 ± 0.0003  | 0.008 ± 0.0004 | 0.004 ± 0.0002  |
| Tb           | 0.001       | 0.002 ± 0.0001 | 0.002 ± 0.0001  | 0.001 ± 0.0001  | 0.001 ± 0.0001 | 0.001 ± 0.0001  |
| Dy           | 0.005       | 0.008 ± 0.0002 | 0.002 ± 0.0001  | 0.003 ± 0.0001  | 0.005 ± 0.0002 | 0.003 ± 0.0002  |
| Ho           | 0.001       | 0.002 ± 0.0001 | 0.001 ± 0.0001  | 0.001 ± 0.0001  | 0.001 ± 0.0001 | 0.001 ± 0.0001  |
| Er           | 0.004       | 0.004 ± 0.0002 | 0.001 ± 0.00003 | 0.002 ± 0.0001  | 0.003 ± 0.0001 | 0.001 ± 0.00003 |
| Tm           | 0.001       | 0.001 ± 0.0001 | 0.001 ± 0.0001  | 0.001 ± 0.00004 | < 0.001        | 0.001 ± 0.00004 |
| Yb           | 0.004       | 0.003 ± 0.0002 | 0.001 ± 0.0001  | 0.001 ± 0.0001  | 0.002 ± 0.0001 | 0.001 ± 0.0001  |
| Lu           | 0.001       | 0.001 ± 0.0001 | 0.001 ± 0.00003 | 0.001 ± 0.0001  | 0.001 ± 0.0001 | 0.001 ± 0.00004 |
| Re           | –           | 0.008 ± 0.0001 | 0.003 ± 0.0001  | 0.010 ± 0.0003  | 0.021 ± 0.0006 | 0.001 ± 0.00004 |
| Tl           | 1           | 0.003 ± 0.0002 | 0.003 ± 0.0002  | 0.004 ± 0.0002  | < 0.002        | 0.002 ± 0.0001  |
| Bi           | –           | 0.001 ± 0.0001 | 0.001 ± 0.0001  | 0.001 ± 0.00003 | < 0.001        | 0.002 ± 0.0001  |
| Th           | 0.42        | 0.005 ± 0.025  | 0.003 ± 0.0002  | 0.003 ± 0.0001  | < 0.002        | 0.002 ± 0.0001  |
| U            | 3.4         | 0.226 ± 0.004  | 0.076 ± 0.002   | 0.399 ± 0.012   | 0.344 ± 0.072  | 0.084 ± 0.0042  |
